# Supplementary material for: The impact of biological sex on the response to noise and otoprotective therapies against acoustic injury in mice
Source: PubMed Central journal article supplement (PMC5848513; doi:10.1186/s13293-018-0171-0), 2018-03-12

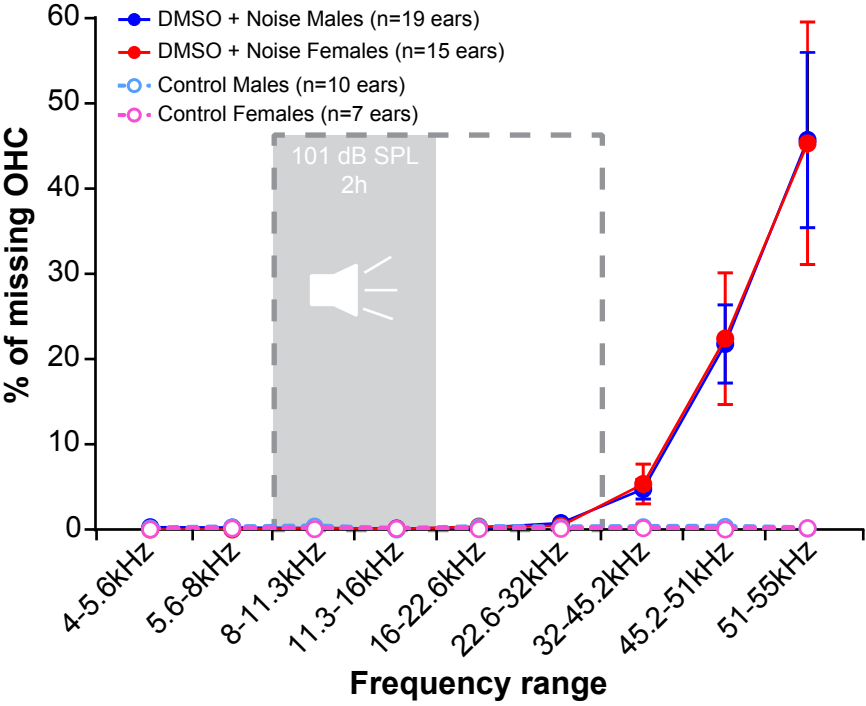

Supplement: 13293_2018_171_MOESM4_ESM.pdf [file 13293_2018_171_MOESM4_ESM.pdf]
